# Supplementary material for: Selection of reference genes for expression analysis of plant-derived microRNAs in Plutella xylostella using qRT-PCR and ddPCR
Source: PubMed Central journal article supplement (PMC6675394; doi:10.1371/journal.pone.0220475), 2019-08-01
Supplement: pone.0220475.s006.pdf [file pone.0220475.s006.pdf]

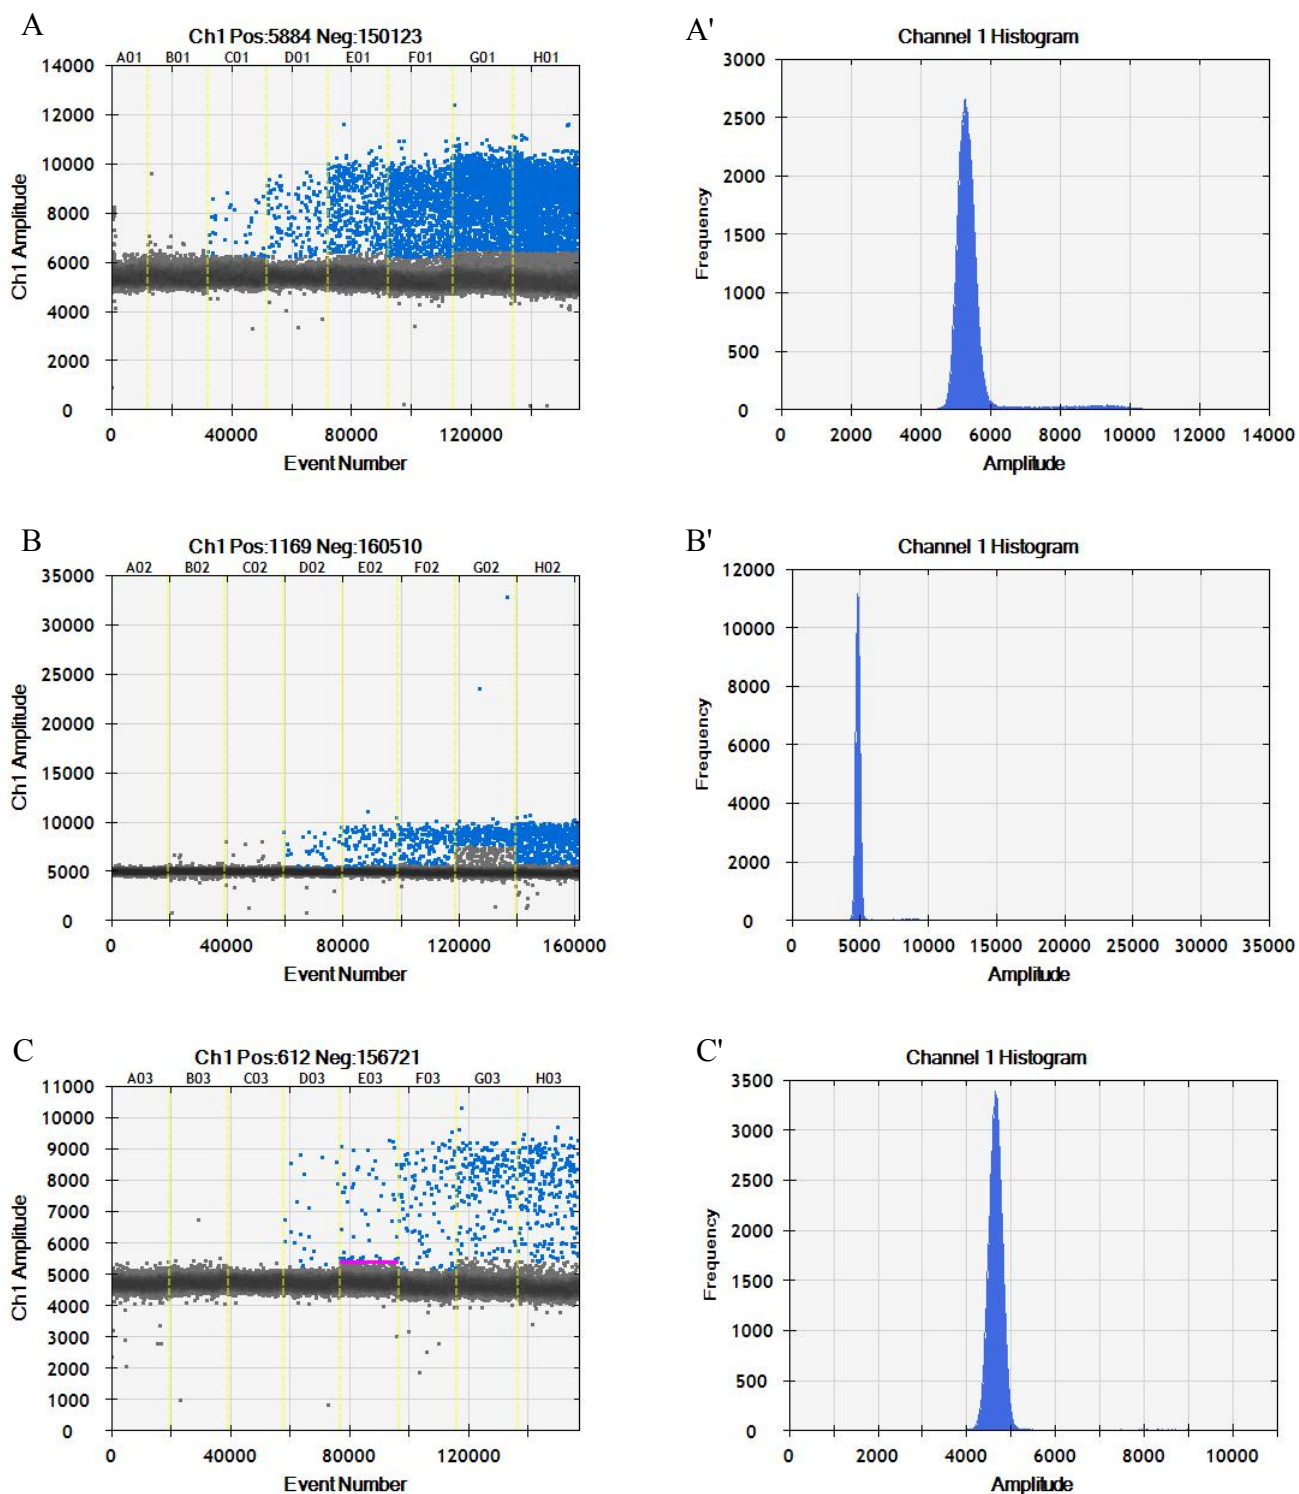

**S4 Fig. 1-D fluorescence amplitude plots (left) and histograms (right) for miR279d.** For the plots, blue dots denote the positive droplets and gray dots denote the negative droplets. Temperature gradients are from 65 °C to 55 °C in the order of columns A to H, including 65 °C, 64.3 °C, 63 °C, 61.1 °C, 58.8 °C, 56.9 °C, 55.7 °C and 55 °C. For the histograms, the left peak represents the frequency of negative droplets and the right peak represents positive droplets. Concentrations of loaded cDNAs are 50 ng, 10 ng and 5 ng for panels (AA'), (BB') and (CC'), respectively.
