# Supplementary material for: Selection of reference genes for expression analysis of plant-derived microRNAs in Plutella xylostella using qRT-PCR and ddPCR
Source: PubMed Central journal article supplement (PMC6675394; doi:10.1371/journal.pone.0220475), 2019-08-01
Supplement: pone.0220475.s008.pdf [file pone.0220475.s008.pdf]

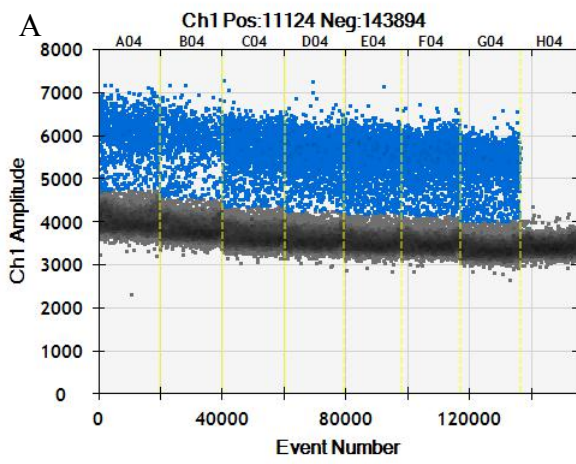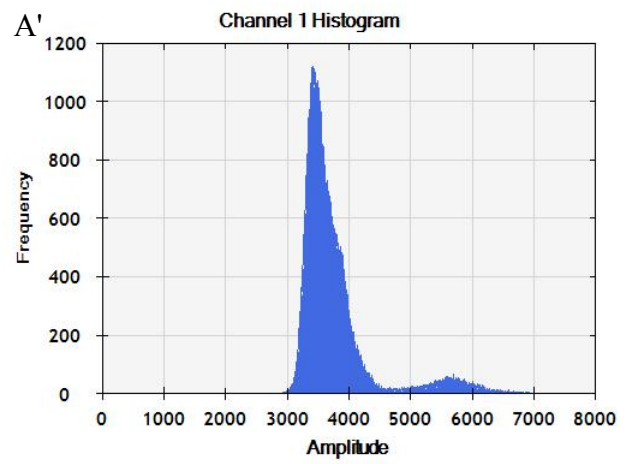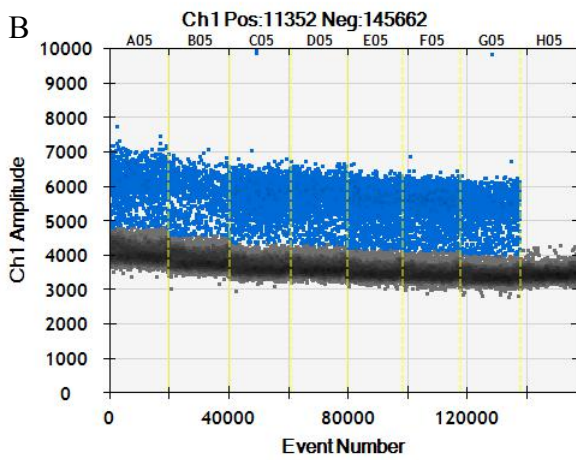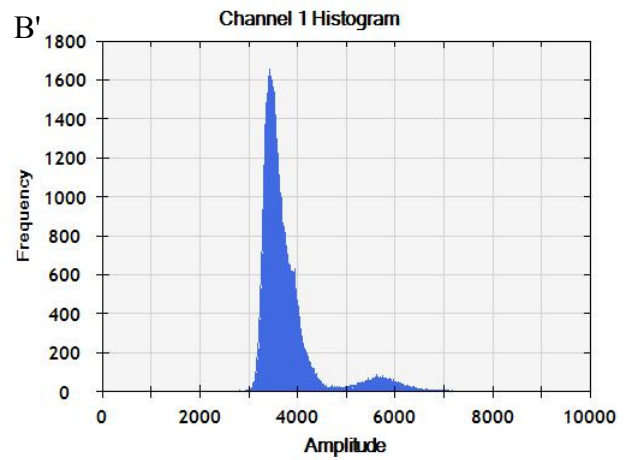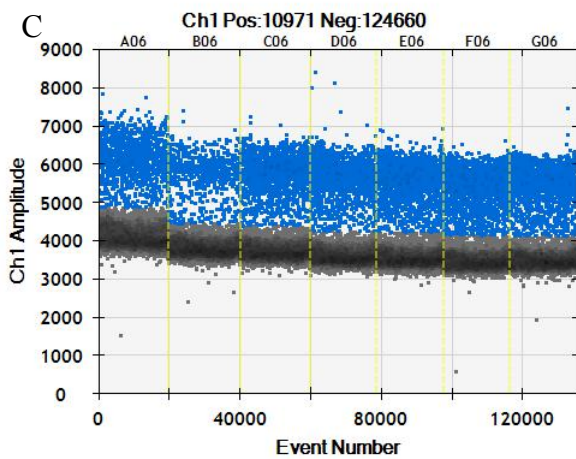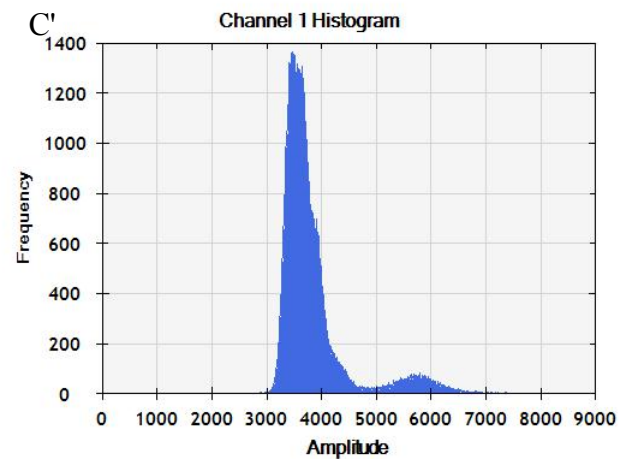

**S6 Fig. 1-D fluorescence amplitude plots (left) and histograms (right) for absolute quantification of miR11 in tissues of GC strain.** The ddPCR assays are performed in three biological replicates (AA', BB' and CC'). For the plots, blue dots denote the positive droplets and gray dots denote the negative droplets. Columns A to G represent tissue samples of GC strain in the order of midgut, silk gland, Malpighian tubule, fat body, hemolymph and remaining tissues. Column H is the no template control for A and B, and pure water control for C with no droplets amplified. For the histograms, the left peak represents the frequency of negative droplets and the right peak represents positive droplets.
